# Supplementary material
Source: Springer Nature journal article supplement (https://www.springermedizin.de/resource/supplementary/12885_2012_3911_MOESM9_ESM.pdf/9464730)

**A** PLC/PRF/6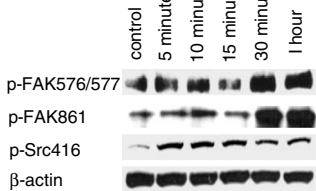**B**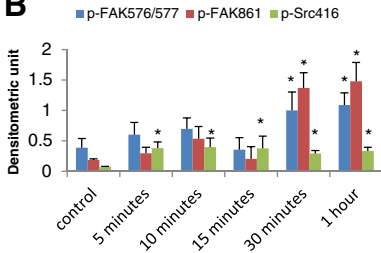**C** Sk-Hep1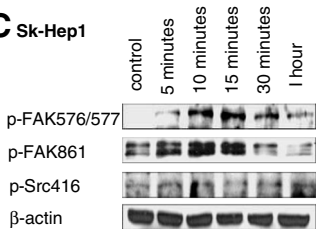**D**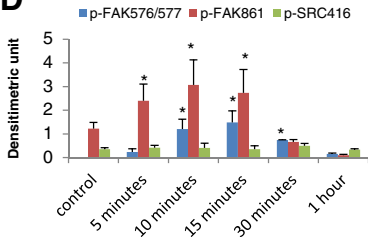

Supplement: MOESM9 [file 9464730]
